# Supplementary material for: Self-Exclusion from Gambling—A Measure of COVID-19 Impact on Gambling in a Highly Online-Based Gambling Market?
Source: MDPI journal article supplement (doi:10.3390/ijerph18147367), 2021-07-09

**Supplementary Figure S1.** Autocorrelations for the total numbers of self-excluded, per week, for the 1-month and 3-month self-exclusion periods, respectively.

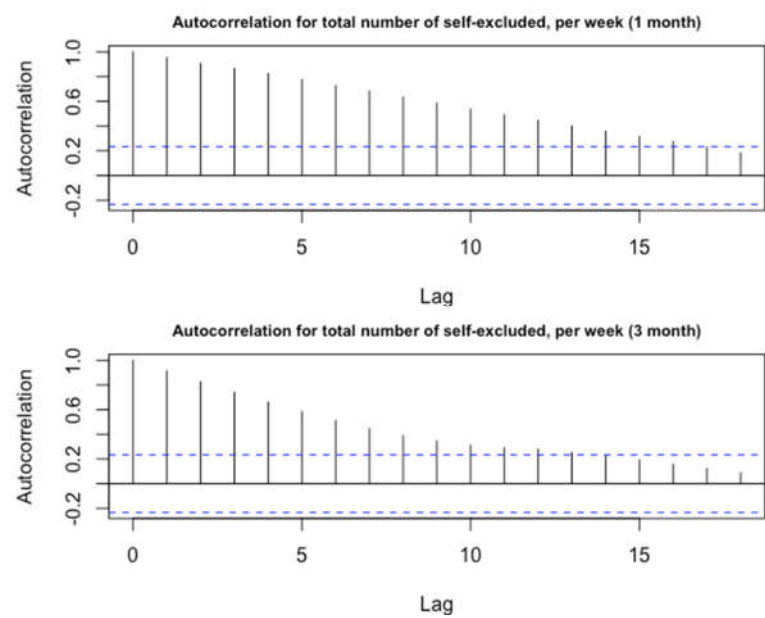

**Supplementary Figure S2.** Autocorrelations for the weekly changes in numbers of self-excluded, per week, for the 1-month and 3-month self-exclusion periods, respectively.

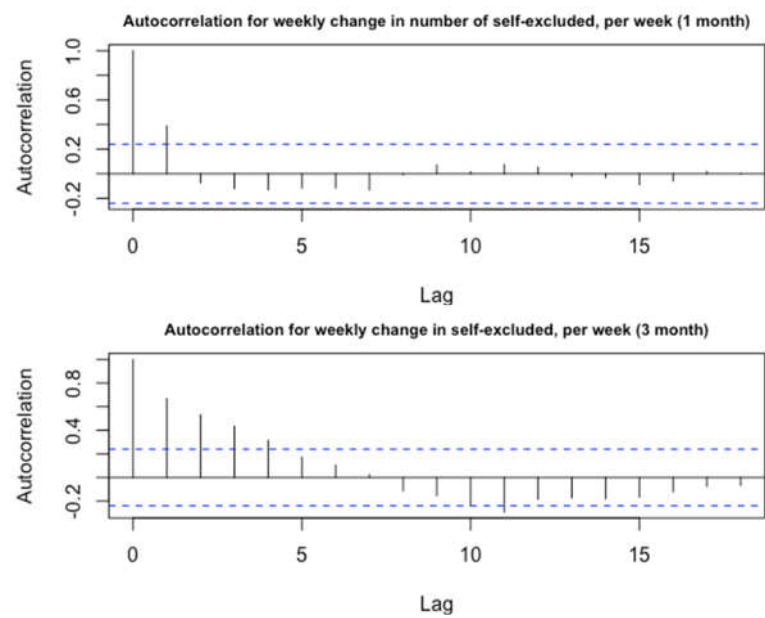

Supplement: s1 [file s1]
